# Supplementary material for: Photoelectrocatalytic application of palladium decorated zinc oxide-expanded graphite electrode for the removal of 4-nitrophenol: experimental and computational studies
Source: Royal Society of Chemistry journal article supplement (doi:10.1039/c8ra00180d), 2018-01-01
Supplement: c8ra00180d1.pdf [file c8ra00180d1.pdf]

Supplementary information

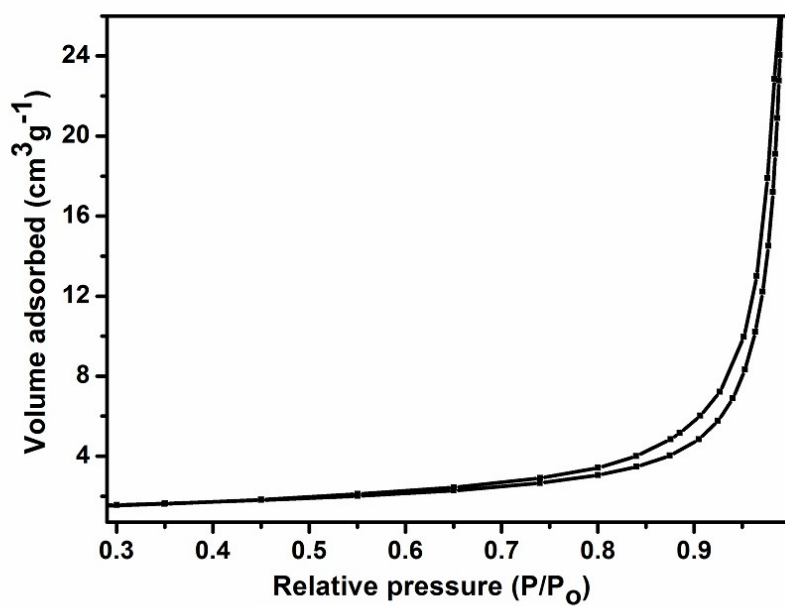

Figure S1. Nitrogen adsorption-desorption isotherms of Pd-ZnO-EG sample.

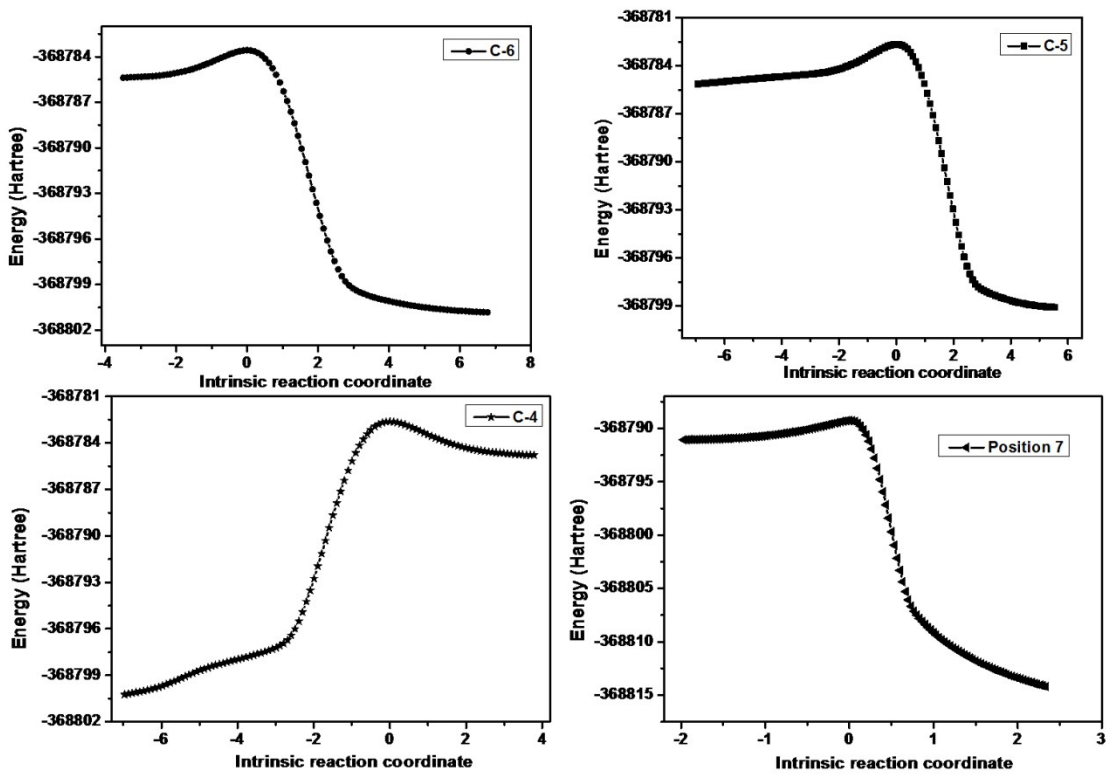

a)

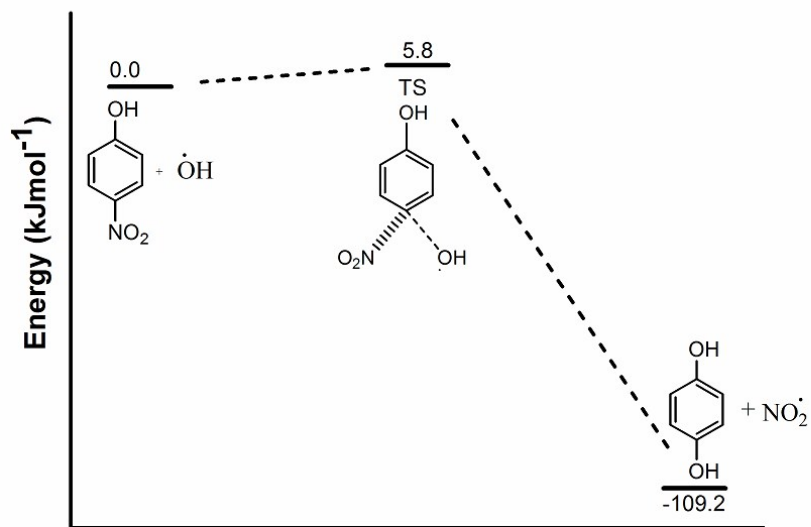

b)

Figure S2. (a) Various reaction coordinates for the hydroxyl attacks on the various positions of the 4-nitrophenol. (b) Energy profile diagram for the nitrophenol degradation pathways leading to the formation hydroquinone from the hydroxyl attack on position 4.

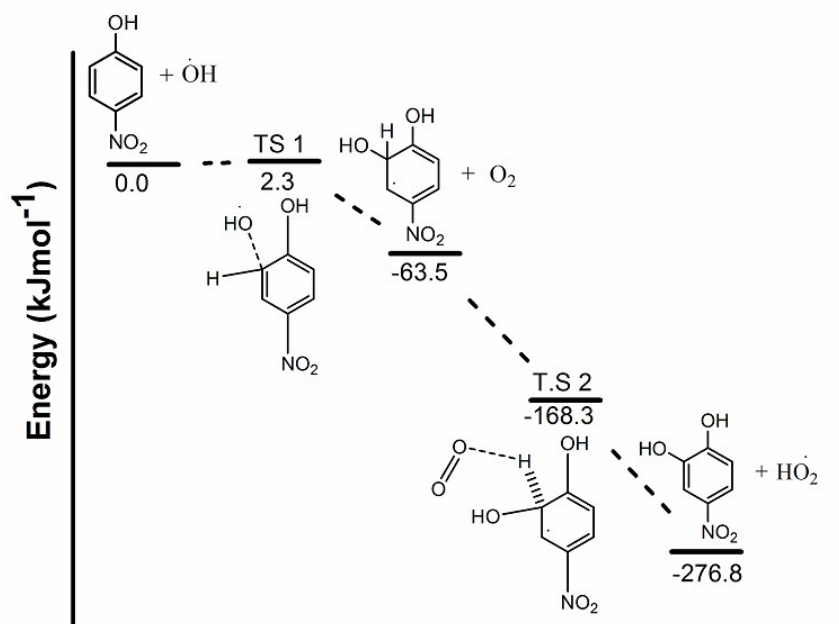

a)

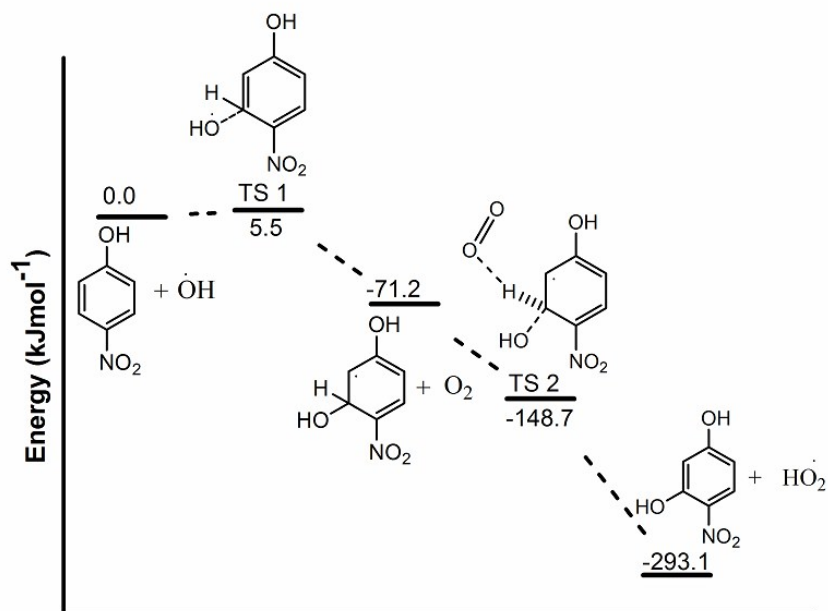

b)

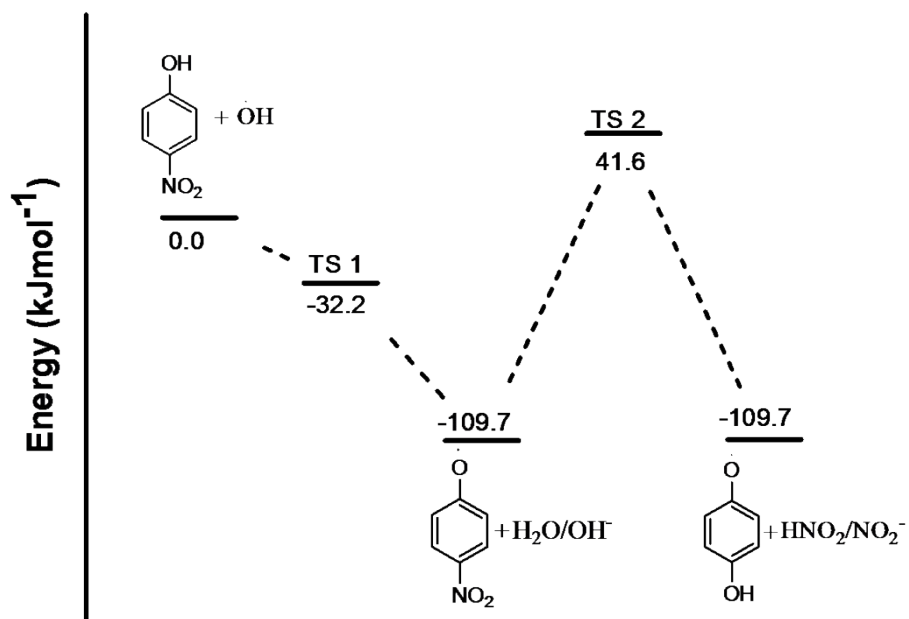

c)

Figure S3. Energy profile for the 4-nitrophenol degradation pathways leading to the formation of (a) catechol, (b) resorcinol, and (c) semiquinone radical.
